# Supplementary material for: Impact of oil spills on coral reefs can be reduced by bioremediation using probiotic microbiota
Source: PubMed Central journal article supplement (PMC4677405; doi:10.1038/srep18268), 2015-12-14

# Impact of oil spills on coral reefs can be reduced by bioremediation using probiotic microbiota

Henrique Fragoso dos Santos, Gustavo Duarte, Caio Tavora Coelho da Costa Rachid, Ricardo Chaloub, Emiliano Nicolas Calderon, Laura Fernandes de Barros Marangoni, Adalto Bianchini, Adriana Haddad Nudi, Flavia Lima do Carmo, Jan Dirk van Elsas, Alexandre Soares Rosado, Clóvis Barreira e Castro, Raquel Silva Peixoto

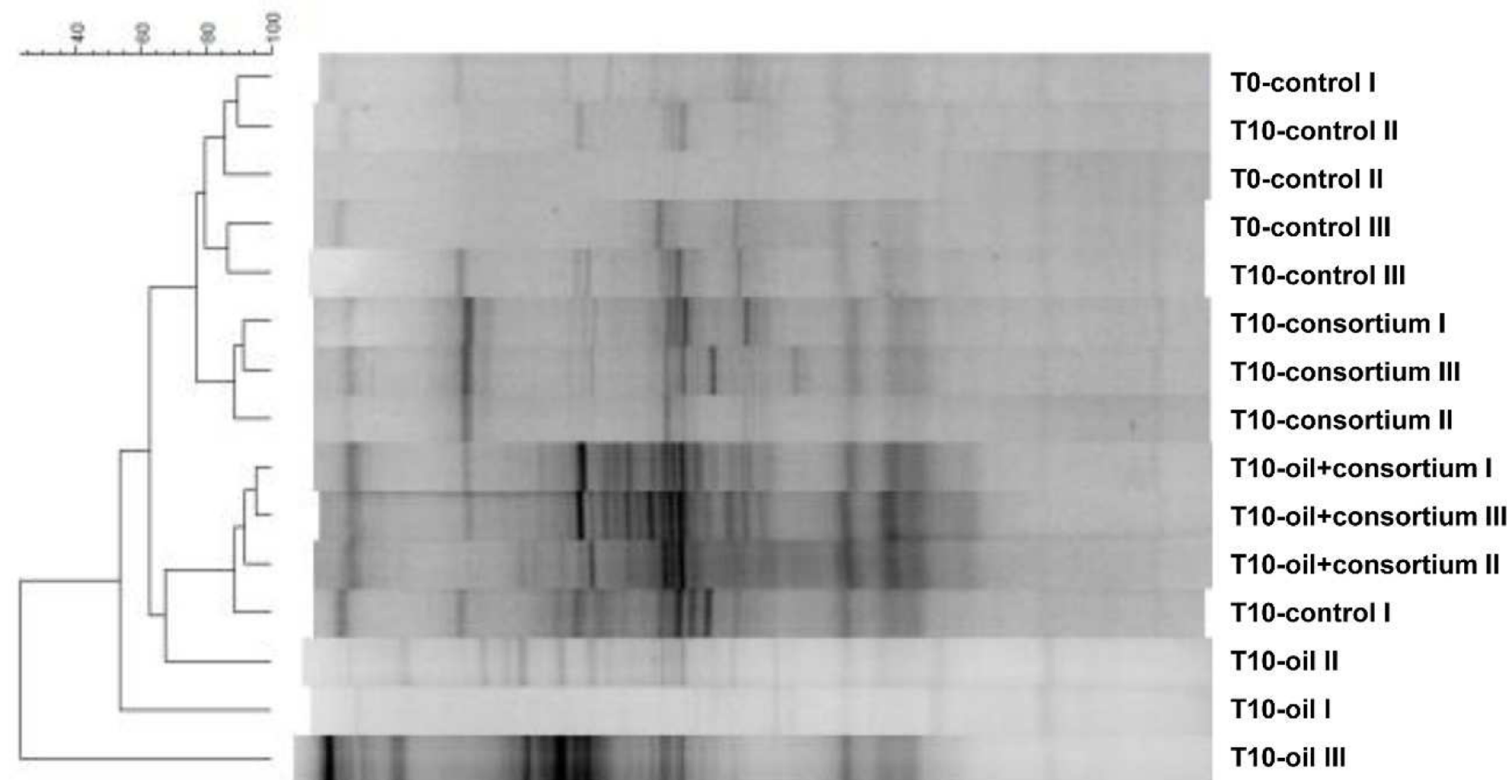

Supplement: srep18268-s1.pdf [file srep18268-s1.pdf]
